# Supplementary material
Source: PubMed Central journal article supplement (PMC6197057)
Supplement: NIHMS978143-supplement-Supplemental_Figure_1.pdf [file NIHMS978143-supplement-Supplemental_Figure_1.pdf]

Blot Images from Figure 2

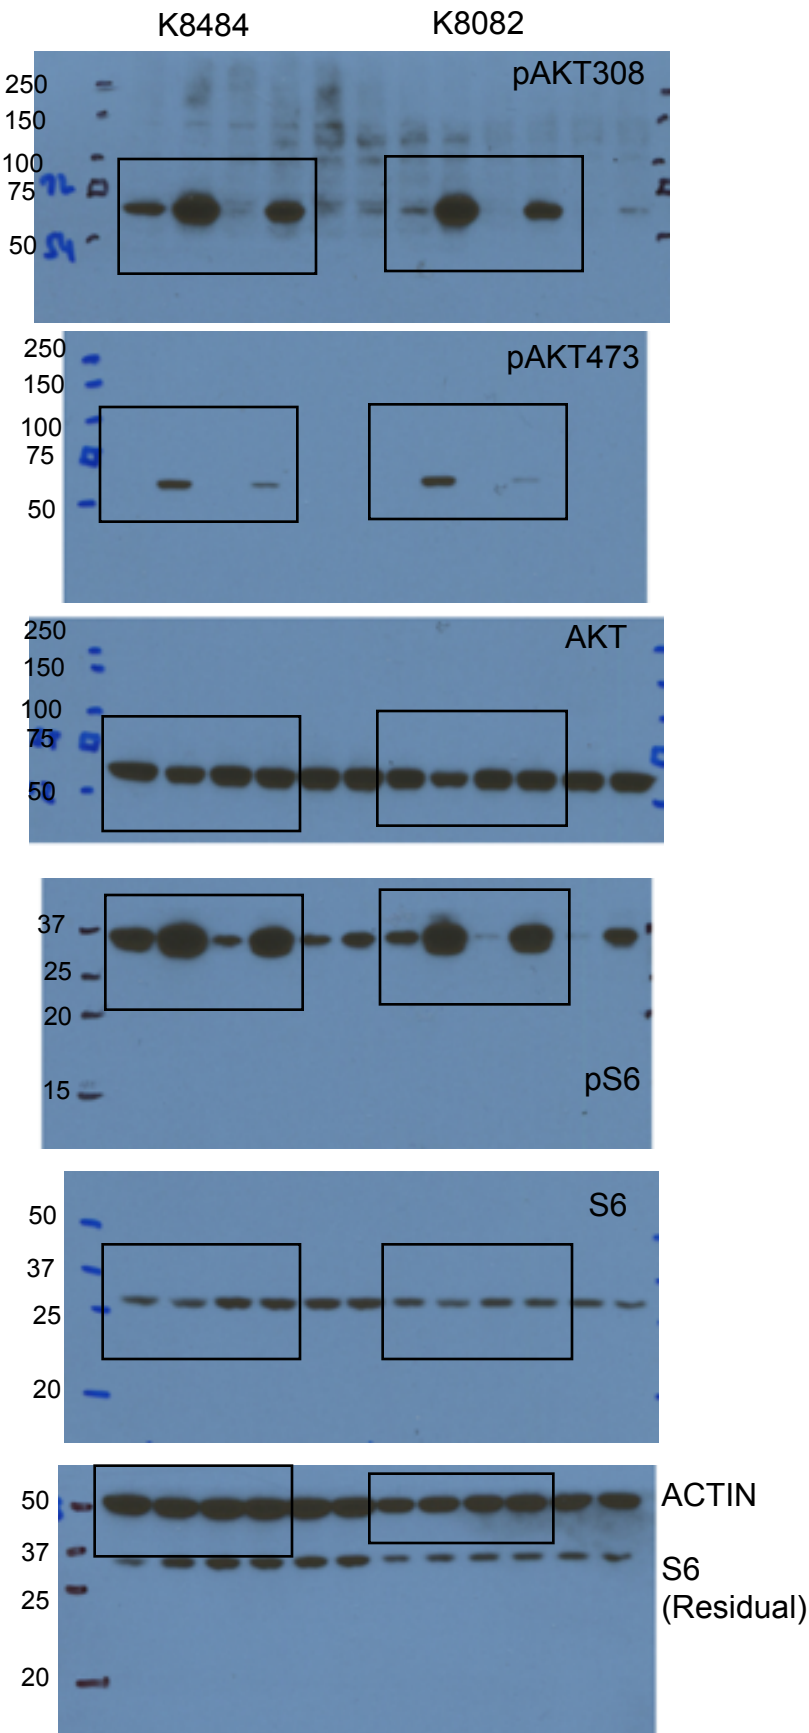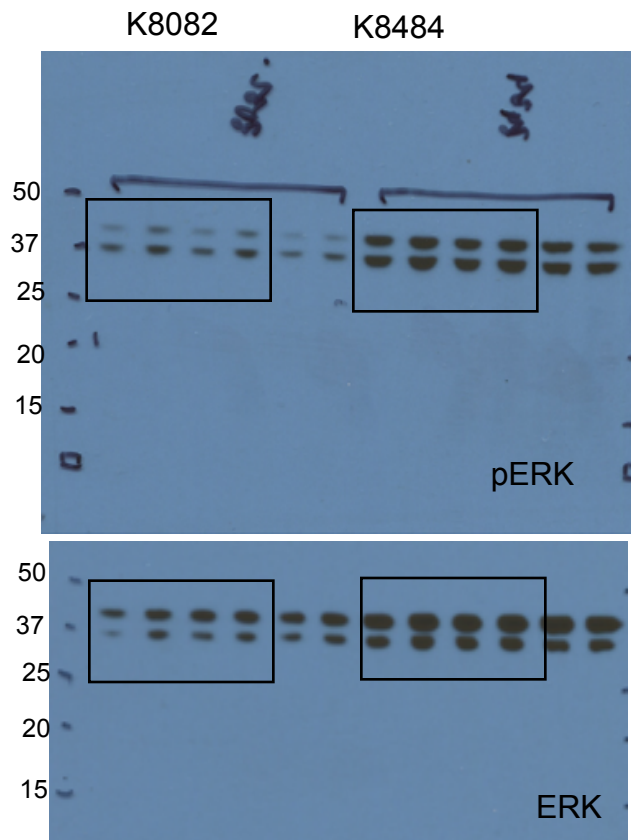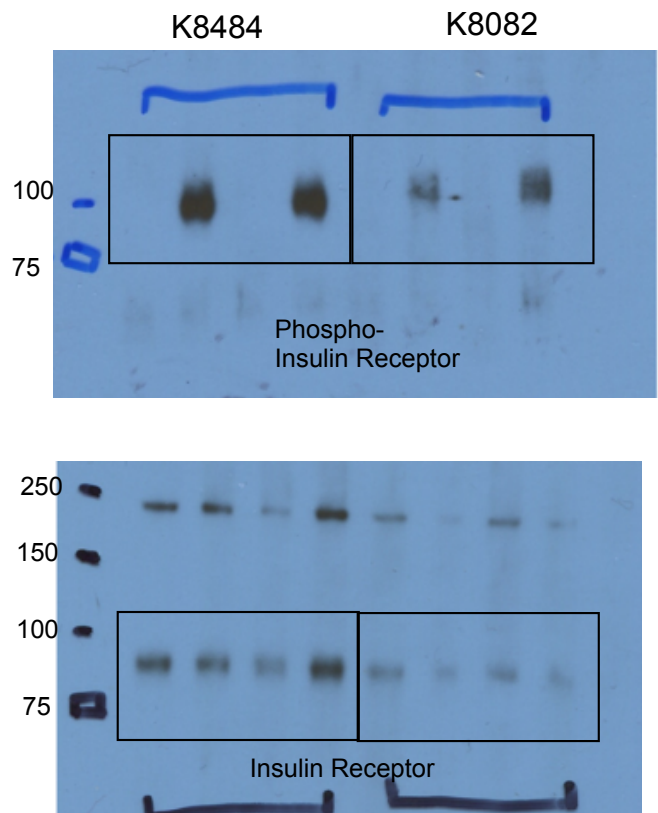

Whole scanned images of blots from Figure 2. The same Lysates were run on 4 different membranes across three days. Blots on the left are from the first day. To probe for pAKT473 and 308 in addition to pS6 both membranes were cut prior to blotting. Images on the right are from a subsequent membrane. The third membrane was run on the same samples during the review process to address a reviewer question. Images were cropped as indicated by rectangles to make the figures.
