# Supplementary material
Source: PubMed Central journal article supplement (PMC6197057)

Blot Images From Extended Figure 4

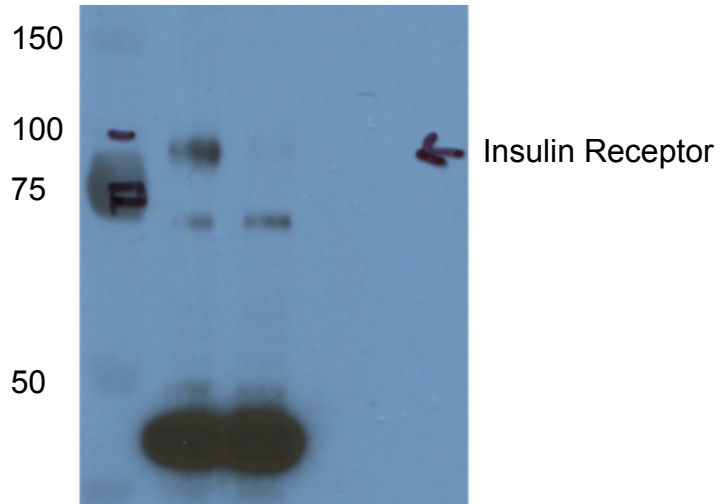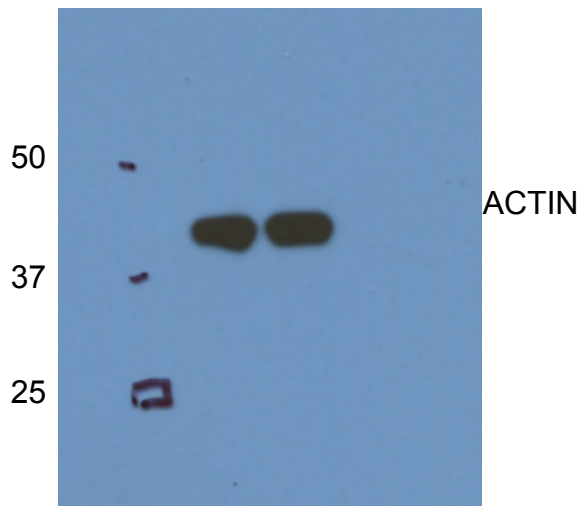

Supplement: NIHMS978143-supplement-Supplemental_Figure_2.pdf [file NIHMS978143-supplement-Supplemental_Figure_2.pdf]
